# Supplementary material
Source: PubMed Central journal article supplement (PMC4419204)

**A**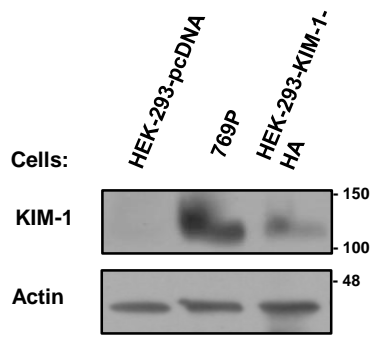**B**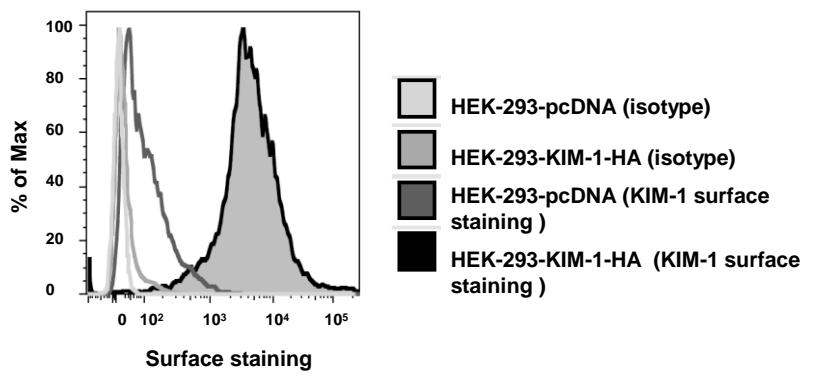**C**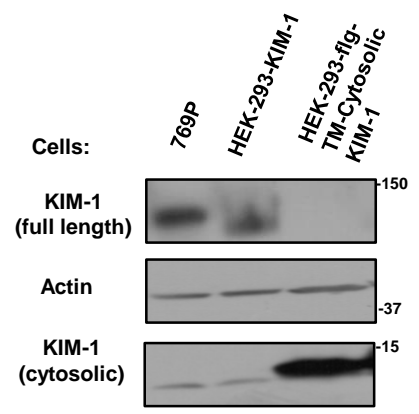

Supplement: mmc1.pdf [file mmc1.pdf]

A

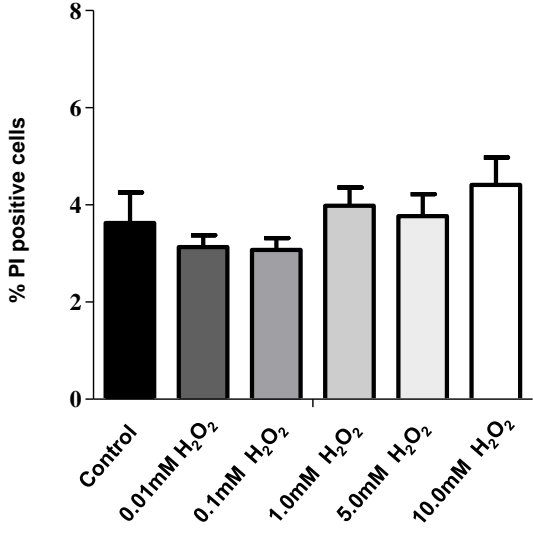

B

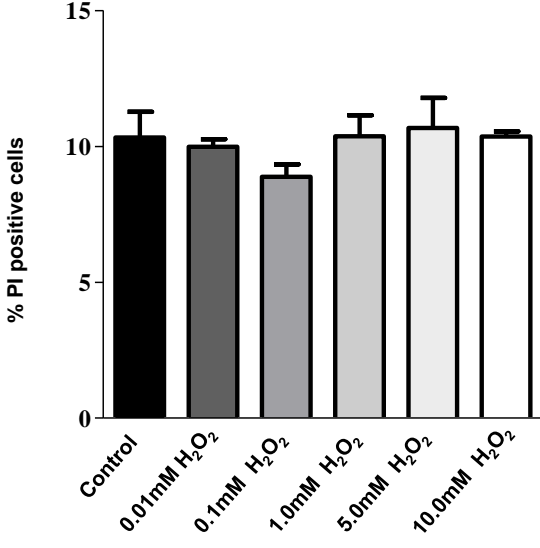

Supplement: mmc2.pdf [file mmc2.pdf]
